# Supplementary material for: Primary tumor associated macrophages activate programs of invasion and dormancy in disseminating tumor cells
Source: PubMed Central journal article supplement (PMC8811052; doi:10.1038/s41467-022-28076-3), 2022-02-02
Supplement: 41467_2022_28076_MOESM5_ESM.pdf [file 41467_2022_28076_MOESM5_ESM.pdf]

## Supplementary Movie Legends

**Title:** Supplementary Movie 1:

**Description:** Time Lapse movie of a tumor cell. Left: Red (blood) channel was averaged to improve definition of the vascular boundaries. Right: Raw imaging data. Red = 155kD TMRdextran labeled vasculature. Green = GFP tumor cell.

**Title:** Supplementary Movie 2:

**Description:** Time Lapse movie corresponding to Supplemental Figure 1a showing the movement of an intravascular disseminated tumor cell. Left: Red (blood) channel was averaged to improve definition of the vascular boundaries. Right: Raw imaging data. Red = 155kD TMR-dextran labeled vasculature. Green = GFP tumor cell. Cyan = Macrophages.

**Title:** Supplementary Movie 3:

**Description:** Time Lapse movie corresponding to Supplemental Figure 1b showing the movement of an extravascular disseminated tumor cell. Left: Red (blood) channel was averaged to improve definition of the vascular boundaries. Right: Raw imaging data. Red = 155kD TMR-dextran labeled vasculature. Green = GFP tumor cell.
